# Supplementary material
Source: publisher figshare collection journal article supplement (https://gsapubs.figshare.com/ndownloader/files/38883168)
Supplement: Supplementary file 1 [file 38883168]

## Sheet: Logan WR969-1 STO
Sample data for well: LOGAN-WALKER RIDGE WR 969#1 ST0
top	Horizons	Abundance	Diversity	Biantholithus astralis	Biantholithus flosculus	Blackites perlongus	Bomolithus aquilus (sm)	Bomolithus supremus	Campylosphaera dela (<7)	Campylosphaera dela (>7)	Campylosphaera eodela (<7)	Campylosphaera eodela (>7)	Caycedoae conicus	Caycedoae megastypus	Chiasmolithus bidens	Chiasmolithus californicus	Chiasmolithus consuetus	Chiasmolithus nitidus	Coccolithus bownii	Coccolithus foraminis	Coccolithus latus	Coccolithus pauxillus	Coccolithus pelagicus	Coccolithus pelagicus (10-13)	Coccolithus pliopelagicus	Craticullithus lamina	Cruciplacolithus edwardsii	Cruciplacolithus intermedius	Cruciplacolithus latipons (<5)	Cruciplacolithus latipons (>5)	Cruciplacolithus primus (5-7)	Cruciplacolithus primus (<5)	Cyclagelosphaera parva	Discoaster acutus	Discoaster araneus	Discoaster diastypus	Discoaster falcatus	Discoaster lenticularis	Discoaster limbatus	Discoaster mahmoudii (5ray)	Discoaster mahmoudii (6ray) (s.l.)	Discoaster mahmoudii (7ray)	Discoaster mahmoudii (7ray) (s.l.)	Discoaster mediosus	Discoaster mohleri	Discoaster aff. mohleri	Discoaster multiradiatus	Discoaster multiradiatus (>15)	Discoaster multiradiatus (T2I)
25980		0	0
26150	NP10-7	38	33				1			1										1		1	2	1	1	1									1	1		1	1				1	2	1	1	2	1
26200		0	0
26250		26	23																	1	1		2	1	1													1		1							1	1
26390		21	19																1		1		2	1	1						1																1
26440	NP10-4	180	59	2	1		1	1	2	1	1				1	1		2	1	1		1	30	5	10			1	1	1		1	1		1			1	1					1	1	2	4	1	3
26460		183	73	1		1			2	1	1	1			1	1	1	1	1	1		1	25	10	2						1		1	1	1		1	1	1			1		1	1	1	6	2	3
26590		8	5																				2																										1
26640	NP10-2	89	69	2			1	1	1	1	1			1			1	1	2				6	1	1	1	1				1		1	2	1		1	1	1		1				1	1	2	1	2
26670		4	3
26700		0	0
26740		0	0
26760		0	0
26800		3	3																				1
26820		2	2																				1
26840	NP10-0	19	17										1										1											1													1
26900		0	0
26940		0	0
27120		0	0
27130		2	2
27240		0	0
top	Horizons	Abundance	Diversity	Ericsonia orbis	Fasciculithus aubertae	Fasciculithus clinatus	Fasciculithus involutus	Fasciculithus lillianiae	Fasciculithus lingfengensis	Fasciculithus lobus	Fasciculithus richardii	Fasciculithus sidereus	Fasciculithus thomasii	Fasciculithus tympaniformis	Hornibrookina arca	Micrantholithus breviradiatus	Micula decussata	Neochiastozygus concinnus	Neochiastozygus distentus	Neochiastozygus junctus	Neochiastozygus rosenkrantzii	Neochiastozygus tenansa	Neococcolithes protenus	Neocrepidolithus bukryi	Pontosphaera pectinata	Pontosphaera plana	Prinsius bisulcus	Prinsius martinii	Reworked Cretaceous	Rhomboaster bitrifida	Rhomboaster cuspis	Sphenolithus acervus	Sphenolithus anarrhopus	Sphenolithus moriformis	Sphenolithus primus	Thoracosphaera spp.	Toweius callosus	Toweius eminens (<8)	Toweius eminens (>8)	Toweius occultatus	Toweius octocavus	Toweius oztunalii	Toweius patellus	Toweius pertusus	Toweius rotundus	Toweius serotinus	Toweius serotinus (<7)	Transversopontis exilis	Tribrachiatus bramlettei
25980		0	0
26150	NP10-7	38	33			1								2			1										1			1	2	1		1			1					1		2			1		2
26200		0	0
26250		26	23		1				1					1			1											1	2		1	1			1		1	1						2			1
26390		21	19		1				1					1																1	1	1		1	1		1							2			1		1
26440	NP10-4	180	59		1	1	1		1					3			1		1	2			1				5	5		1	3	1	1	2	15	1	3	2	1			2	1	35	2				1
26460		183	73	1	1	1	1		1					1	1		1		1	1	1	1	1	1		1	3	2		1	3	1	1	5	10	1	1	1	1	1		10	1	40	1	1		1	1
26590		8	5											3				1																	1
26640	NP10-2	89	69	1	1	1	1		1	1	1	1	1	1		1	1	1		1			1		1		1	2		1	2	1		1	2		1	2	1	1	2	1	1	4	1	1	2
26670		4	3				2							1																														1
26700		0	0
26740		0	0
26760		0	0
26800		3	3				1		1
26820		2	2											1
26840	NP10-0	19	17		1		1	1	1		2	1		2													1	1			1	1			1		1
26900		0	0
26940		0	0
27120		0	0
27130		2	2																																1									1
27240		0	0
[truncated: 5 more columns]

## Sheet: G50641
Vimpere, L., et al., 2023, Carbon isotope and biostratigraphic evidence for an expanded Paleocene–Eocene Thermal Maximum sedimentary record in the deep Gulf of Mexico: Geology, https://doi.org/10.1130/G50641.1
